# Supplementary material for: DNA methylation-based measures of biological aging and cognitive decline over 16-years: preliminary longitudinal findings in midlife
Source: PubMed Central journal article supplement (PMC9792211; doi:10.18632/aging.204376), 2022-11-11
Supplement: aging-14-204376-s002.pdf [file aging-14-204376-s002.pdf]

## SUPPLEMENTARY FIGURE

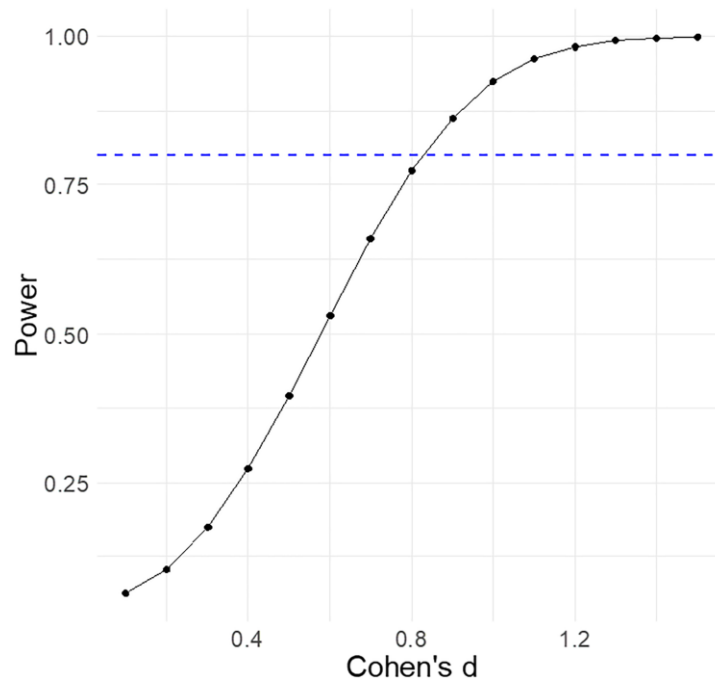

**Supplementary Figure 1. Power curve for two-sample independent t-test with 24 participants per group and  $\alpha = .05$ . Dashed horizontal line indicates power of 0.80.**
