# Supplementary material for: DNA methylation-based measures of biological aging and cognitive decline over 16-years: preliminary longitudinal findings in midlife
Source: PubMed Central journal article supplement (PMC9792211; doi:10.18632/aging.204376), 2022-11-11
Supplement: aging-14-204376-s003.pdf [file aging-14-204376-s003.pdf]

**SUPPLEMENTARY TABLES**

**Supplementary Table 1. Main effects of group and time for traditional epigenetic clocks.**

|                       | Horvath                    |                  | Hannum                     |                  | PhenoAge                    |                  | GrimAge                    |                  |
|-----------------------|----------------------------|------------------|----------------------------|------------------|-----------------------------|------------------|----------------------------|------------------|
|                       | $\gamma$ (CI)              | <i>p</i>         | $\gamma$ (CI)              | <i>p</i>         | $\gamma$ (CI)               | <i>p</i>         | $\gamma$ (CI)              | <i>p</i>         |
| Intercept             | 47.40<br>(45.49–49.31)     | <b>&lt;0.001</b> | 39.65<br>(37.98–41.32)     | <b>&lt;0.001</b> | 34.80<br>(32.47–37.13)      | <b>&lt;0.001</b> | 48.35<br>(46.06–50.65)     | <b>&lt;0.001</b> |
| Female                | -0.89<br>(-2.93–1.16)      | 0.398            | -2.83<br>(-4.61–-1.05)     | <b>0.003</b>     | -0.58<br>(-3.02–1.87)       | 0.646            | -1.56<br>(-4.05–0.93)      | 0.226            |
| Baseline Age          | 0.81<br>(0.65–0.98)        | <b>&lt;0.001</b> | 0.88<br>(0.74–1.03)        | <b>&lt;0.001</b> | 1.12<br>(0.93–1.31)         | <b>&lt;0.001</b> | 0.81<br>(0.61–1.01)        | <b>&lt;0.001</b> |
| Group-Decliners       | -1.17<br>(-3.19–0.86)      | 0.265            | -1.58<br>(-3.35–0.19)      | 0.086            | -0.03<br>(-2.45–2.40)       | 0.984            | 1.91<br>(-0.56–4.38)       | 0.136            |
| Time                  | 12.75<br>(11.86–13.64)     | <b>&lt;0.001</b> | 13.11<br>(12.29–13.93)     | <b>&lt;0.001</b> | 15.30<br>(13.91–16.70)      | <b>&lt;0.001</b> | 12.42<br>(11.70–13.15)     | <b>&lt;0.001</b> |
| <b>Random Effects</b> |                            |                  |                            |                  |                             |                  |                            |                  |
| $\sigma^2$            | 4.71                       |                  | 3.99                       |                  | 11.54                       |                  | 3.15                       |                  |
| $\tau_{00}$           | 9.76 <small>ahabid</small> |                  | 7.19 <small>ahabid</small> |                  | 11.58 <small>ahabid</small> |                  | 16.38 <small>habid</small> |                  |
| N                     | 48 <small>ahabid</small>   |                  | 48 <small>ahabid</small>   |                  | 48 <small>ahabid</small>    |                  | 48 <small>ahabid</small>   |                  |
| Observations          | 96                         |                  | 96                         |                  | 96                          |                  | 96                         |                  |

95% Confidence Intervals (CI) are reported.

**Supplementary Table 2. Main effects of group and time on PC-clocks and pace of aging measures, controlling for cell percentages.**

|                       | PC-Horvath                 |                  | PC-Hannum                  |                  | PC-PhenoAge                 |                  | PC-GrimAge                  |                  | Dunedin PoAm               |                  | Dunedin PACE               |                  |
|-----------------------|----------------------------|------------------|----------------------------|------------------|-----------------------------|------------------|-----------------------------|------------------|----------------------------|------------------|----------------------------|------------------|
|                       | $\gamma$ (CI)              | <i>p</i>         | $\gamma$ (CI)              | <i>p</i>         | $\gamma$ (CI)               | <i>p</i>         | $\gamma$ (CI)               | <i>p</i>         | $\gamma$ (CI)              | <i>p</i>         | $\gamma$ (CI)              | <i>p</i>         |
| Intercept             | 49.26<br>(47.71–50.81)     | <b>&lt;0.001</b> | 55.18<br>(53.63–56.73)     | <b>&lt;0.001</b> | 45.66<br>(43.39–47.93)      | <b>&lt;0.001</b> | 58.91<br>(57.14–60.67)      | <b>&lt;0.001</b> | 1.00<br>(0.96–1.04)        | <b>&lt;0.001</b> | 0.90<br>(0.84–0.96)        | <b>&lt;0.001</b> |
| Female                | -3.06<br>(-4.70–-1.41)     | <b>0.001</b>     | -2.51<br>(-4.16–-0.87)     | <b>0.006</b>     | -1.83<br>(-4.28–0.61)       | 0.163            | -2.09<br>(-4.01–-0.17)      | <b>0.045</b>     | 0.01<br>(-0.03–0.05)       | 0.742            | -0.01<br>(-0.07–0.06)      | 0.882            |
| Baseline Age          | 0.84<br>(0.71–0.97)        | <b>&lt;0.001</b> | 0.86<br>(0.73–0.99)        | <b>&lt;0.001</b> | 1.06<br>(0.86–1.25)         | <b>&lt;0.001</b> | 0.79<br>(0.64–0.94)         | <b>&lt;0.001</b> | 0.00<br>(-0.00–0.00)       | 0.399            | 0.00<br>(-0.00–0.01)       | 0.677            |
| Group-Decliners       | -0.59<br>(-2.23–1.04)      | 0.495            | -0.22<br>(-1.85–1.41)      | 0.799            | 1.66<br>(-0.77–4.09)        | 0.201            | 2.15<br>(0.24–4.05)         | <b>0.038</b>     | 0.04<br>(0.00–0.09)        | <b>0.048</b>     | 0.08<br>(0.01–0.14)        | <b>0.030</b>     |
| Time                  | 11.25<br>(10.58–11.91)     | <b>&lt;0.001</b> | 11.74<br>(11.07–12.41)     | <b>&lt;0.001</b> | 13.73<br>(12.97–14.48)      | <b>&lt;0.001</b> | 12.18<br>(11.74–12.61)      | <b>&lt;0.001</b> | 0.02<br>(0.01–0.04)        | <b>0.012</b>     | 0.03<br>(0.00–0.06)        | <b>0.030</b>     |
| CD8 T cell            | -11.78<br>(-94.81–71.25)   | 0.789            | -14.70<br>(-98.24–68.84)   | 0.740            | 67.84<br>(-27.49–163.18)    | 0.184            | -10.84<br>(-66.86–45.17)    | 0.715            | -1.83<br>(-3.70–0.03)      | 0.069            | -0.59<br>(-3.90–2.72)      | 0.738            |
| CD4 T cell            | 6.63<br>(-36.09–49.34)     | 0.770            | 19.75<br>(-23.22–62.73)    | 0.388            | 48.93<br>(-0.11–97.98)      | 0.065            | 21.35<br>(-7.47–50.16)      | 0.167            | -0.67<br>(-1.63–0.29)      | 0.192            | 0.28<br>(-1.43–1.98)       | 0.760            |
| NK cell               | 30.17<br>(-17.47–77.80)    | 0.236            | 49.66<br>(1.73–97.58)      | 0.056            | 78.80<br>(24.13–133.47)     | <b>0.009</b>     | 23.22<br>(-8.89–55.34)      | 0.177            | -0.20<br>(-1.27–0.87)      | 0.720            | 0.16<br>(-1.74–2.06)       | 0.873            |
| Plasma Blasts         | 0.28<br>(-5.08–5.64)       | 0.921            | 1.47<br>(-3.92–6.86)       | 0.606            | 0.36<br>(-5.81–6.54)        | 0.912            | 0.55<br>(-3.09–4.18)        | 0.776            | -0.10<br>(-0.22–0.03)      | 0.141            | 0.03<br>(-0.19–0.24)       | 0.819            |
| Monocytes             | 6.43<br>(-47.64–60.50)     | 0.822            | 28.13<br>(-26.27–82.53)    | 0.332            | 70.73<br>(8.56–132.89)      | <b>0.037</b>     | 27.31<br>(-9.25–63.87)      | 0.163            | -0.74<br>(-1.96–0.47)      | 0.252            | -0.30<br>(-2.45–1.86)      | 0.795            |
| Granulocytes          | 19.49<br>(-17.07–56.05)    | 0.317            | 35.31<br>(-1.48–72.09)     | 0.075            | 80.82<br>(38.88–122.76)     | <b>0.001</b>     | 33.02<br>(8.40–57.65)       | <b>0.015</b>     | -0.09<br>(-0.91–0.73)      | 0.836            | 0.53<br>(-0.93–1.99)       | 0.494            |
| <b>Random Effects</b> |                            |                  |                            |                  |                             |                  |                             |                  |                            |                  |                            |                  |
| $\sigma^2$            | 1.97                       |                  | 1.99                       |                  | 2.48                        |                  | 0.84                        |                  | 0.00                       |                  | 0.00                       |                  |
| $\tau_{00}$           | 6.75 <small>ahabid</small> |                  | 6.69 <small>ahabid</small> |                  | 15.96 <small>ahabid</small> |                  | 10.22 <small>ahabid</small> |                  | 0.00 <small>ahabid</small> |                  | 0.01 <small>ahabid</small> |                  |
| N                     | 48 <small>ahabid</small>   |                  | 48 <small>ahabid</small>   |                  | 48 <small>ahabid</small>    |                  | 48 <small>ahabid</small>    |                  | 48 <small>ahabid</small>   |                  | 48 <small>ahabid</small>   |                  |
| Obs                   | 96                         |                  | 96                         |                  | 96                          |                  | 96                          |                  | 96                         |                  | 96                         |                  |

95% Confidence Intervals (CI) are reported.

**Supplementary Table 3. Scaled cognitive components for decliners (*n* = 24) and maintainers (*n* = 24).**

| Scaled cognitive component | <i>n</i> miss <sup>a</sup> | Overall       | Decliners     | Maintainers   | <i>p</i> -value <sup>b</sup> |
|----------------------------|----------------------------|---------------|---------------|---------------|------------------------------|
| Matrix Reasoning           |                            |               |               |               |                              |
| T1                         | 0                          | 74.31 (12.21) | 74.23 (10.04) | 74.38 (14.28) | 0.966                        |
| T2                         | 0                          | 70.45 (13.93) | 65.59 (15.81) | 75.31 (9.87)  | <b>0.014</b>                 |
| Digit Span – Forward       |                            |               |               |               |                              |
| T1                         | 0                          | 52.84 (24.93) | 56.44 (21.94) | 49.24 (27.59) | 0.322                        |
| T2                         | 0                          | 50.19 (21.22) | 43.56 (19.14) | 56.82 (21.49) | <b>0.029</b>                 |
| Digit Span – Backwards     |                            |               |               |               |                              |
| T1                         | 0                          | 53.82 (24.31) | 56.25 (24.97) | 51.39 (23.91) | 0.494                        |
| T2                         | 0                          | 44.44 (19.85) | 40.63 (15.98) | 48.26 (22.79) | 0.185                        |
| Trail Making Test (A)      |                            |               |               |               |                              |
| T1                         | 0                          | 95.86 (2.70)  | 95.19 (2.90)  | 96.52 (2.37)  | 0.087                        |
| T2                         | 0                          | 94.35 (4.90)  | 92.36 (5.97)  | 96.34 (2.28)  | 0.004                        |
| Trail Making Test (A-B)    |                            |               |               |               |                              |
| T1                         | 0                          | 87.18 (9.52)  | 86.80 (10.80) | 87.57 (8.26)  | <b>0.784</b>                 |
| T2                         | 0                          | 84.28 (12.45) | 80.82 (15.13) | 87.73 (7.94)  | 0.053                        |
| Stroop Word                |                            |               |               |               |                              |
| T1                         | 0                          | 53.19 (15.60) | 49.67 (16.37) | 56.70 (14.27) | 0.12                         |
| T2                         | 1                          | 43.83 (16.42) | 35.69 (15.47) | 52.33 (12.88) | <b>&lt;0.001</b>             |
| Stroop Color               |                            |               |               |               |                              |
| T1                         | 0                          | 57.19 (14.90) | 54.61 (14.59) | 59.77 (15.07) | 0.234                        |
| T2                         | 1                          | 50.08 (17.17) | 42.46 (16.25) | 58.02 (14.52) | <b>0.001</b>                 |
| Stroop Color-Word          |                            |               |               |               |                              |
| T1                         | 0                          | 38.24 (15.86) | 40.63 (17.53) | 35.85 (13.96) | 0.302                        |
| T2                         | 1                          | 36.14 (17.40) | 29.47 (14.70) | 43.09 (17.55) | <b>0.006</b>                 |
| Digit Vigilance – page 1   |                            |               |               |               |                              |
| T1                         | 0                          | 79.20 (12.61) | 81.17 (11.04) | 77.23 (13.96) | 0.284                        |
| T2                         | 19                         | 71.42 (19.84) | 50.24 (24.60) | 79.49 (9.59)  | <b>&lt;0.001</b>             |
| Digit Vigilance – page 2   |                            |               |               |               |                              |
| T1                         | 0                          | 78.65 (16.08) | 81.15 (11.44) | 76.16 (19.61) | 0.287                        |
| T2                         | 20                         | 72.18 (17.50) | 53.70 (18.13) | 78.34 (12.46) | <b>&lt;0.001</b>             |

Means and standard deviations (SD, in parentheses) are displayed for all scaled cognitive measures (scaled using the proportion of maximum scaling method, range: 0-100, see Methods). Higher scores indicate better performance. T1 = time 1; T2 = time 2. <sup>a</sup>At T1, no cognition data were missing. At T2, 1 participant was missing the Stroop test and 19 were missing Digit Vigilance pages 1 and 2 and 1 was missing just page 2. <sup>b</sup>*p*-value comparing groups using dependent *t*-tests. *p*-values are bold if <0.05.

**Supplementary Table 4. Main effects of scaled T2 cognitive components on PC-GrimAge and pace of aging measures, controlling for cell percentages.**

|                     | PC-GrimAge                |              | Dunedin PoAm              |                      | Dunedin PACE              |              |
|---------------------|---------------------------|--------------|---------------------------|----------------------|---------------------------|--------------|
|                     | $\gamma$ (CI)             | <i>p</i>     | $\gamma$ (CI)             | <i>T2 Predictors</i> | $\gamma$ (CI)             | <i>p</i>     |
| Matrix Reasoning    | -0.066<br>(-0.138-0.005)  | 0.086        | -0.001<br>(-0.003-0.001)  | 0.255                | -0.003<br>(-0.005--0.001) | <b>0.021</b> |
| DS-Forward          | -0.024<br>(-0.074-0.025)  | 0.356        | -0.000<br>(-0.001-0.001)  | 0.794                | -0.001<br>(-0.003-0.001)  | 0.278        |
| DS-Backward         | -0.034<br>(-0.086-0.019)  | 0.229        | -0.000<br>(-0.001-0.001)  | 0.602                | -0.001<br>(-0.003-0.001)  | 0.277        |
| Trail A             | -0.177<br>(-0.385-0.030)  | 0.113        | -0.004<br>(-0.008-0.001)  | 0.140                | -0.008<br>(-0.015--0.001) | <b>0.045</b> |
| Trail A-B           | -0.110<br>(-0.184--0.035) | <b>0.008</b> | -0.002<br>(-0.004--0.001) | <b>0.012</b>         | -0.004<br>(-0.006--0.001) | <b>0.012</b> |
| Stroop Word         | -0.059<br>(-0.119-0.002)  | 0.074        | -0.001<br>(-0.002-0.000)  | 0.116                | -0.002<br>(-0.005--0.000) | <b>0.038</b> |
| Stroop Color        | -0.060<br>(-0.120-0.000)  | 0.066        | -0.001<br>(-0.002-0.000)  | 0.087                | -0.001<br>(-0.004-0.001)  | 0.225        |
| Stroop Color-Word   | -0.079<br>(-0.133--0.024) | <b>0.009</b> | -0.001<br>(-0.002-0.000)  | 0.097                | -0.002<br>(-0.004-0.000)  | 0.087        |
| Digit Vigilance-pg1 | -0.056<br>(-0.131-0.018)  | 0.173        | -0.001<br>(-0.003-0.000)  | 0.165                | -0.001<br>(-0.004-0.002)  | 0.466        |
| Digit Vigilance-pg2 | -0.068<br>(-0.146-0.010)  | 0.122        | -0.002<br>(-0.004-0.000)  | 0.123                | -0.002<br>(-0.005-0.001)  | 0.227        |

95% Confidence Intervals (CI) are reported. Models included female, baseline age, time, and cell percentages (estimates not shown). Higher scaled cognitive scores indicate better performance. Abbreviation: DS: digit span.
